# Supplementary material
Source: publisher figshare collection journal article supplement (https://acs.figshare.com/ndownloader/files/8675761)
Supplement: Supplementary file 1 [file 8675761]

# Component Matters: Paving the Roadmap Toward Enhanced Electrocatalytic Performance of Graphitic C<sub>3</sub>N<sub>4</sub>-Based Catalysts *via* Atomic Tuning

Zengxia Pei,<sup>†</sup> Jingxing Gu,<sup>†</sup> Yukun Wang, Zijie Tang, Zhuoxin Liu, Yan Huang, Yang Huang,

Jingxiang Zhao, Zhongfang Chen\* and Chunyi Zhi\*

Z. Pei, Y. Wang, Z. Tang, Z. Liu, Y. Huang, Dr. C. Zhi

Department of Physics and Materials Materials Science  
City University of Hong Kong  
83 Tat Chee Avenue, Kowloon, Hong Kong 999077, China  
E-mail: [cy.zhi@cityu.edu.hk](mailto:cy.zhi@cityu.edu.hk)

J. Gu, Dr. J. Zhao, Prof. Z. Chen  
Department of Chemistry  
The Institute for Functional Nanomaterials, University of Puerto Rico  
Rio Piedras Campus, San Juan, PR 00931, USA  
E-mail: [zhongfangchen@gmail.com](mailto:zhongfangchen@gmail.com)

Dr. Y. Huang  
College of Materials Science and Engineering, Shenzhen University,  
Shenzhen 518000, China.

Dr. C. Zhi  
Shenzhen Research Institute, City University of Hong Kong  
High-Tech Zone, Nanshan District, Shenzhen 518057, China

---

## Density Functional Theory (DFT) Computations

All the spin-polarized<sup>1, 2</sup> and van der Waals interaction corrected<sup>3</sup> density functional theory (DFT) computations were carried out by the Dmol<sup>3</sup> code. The electron exchange-correlation functional was treated using generalized gradient approximation (GGA) in the form proposed by Perdew, Burke and Ernzerhof (PBE)<sup>4</sup>, and the double numerical plus polarization (DNP) basis set was employed. A convergence criterion of  $10^{-6}$  a.u. was adopted when doing self-consistent field (SCF) computations on the total energy and electronic computations. To simulate a H<sub>2</sub>O solvent environment, we used the conductor-like screen model (COSMO) during the whole process,<sup>5</sup> where the dielectric constant was set as 78.54.

The optimized pristine graphitic C<sub>3</sub>N<sub>4</sub> supercell is rhombic. We set the  $x$  and  $y$  directions parallel to the plane with the cell parameters as  $a=b=7.13$  Å, and the  $z$  direction is perpendicular to the plane with a vacuum layer of 16.13 Å. We constructed doped C<sub>3</sub>N<sub>4</sub> monolayers at the doping concentration of 7.14 at%, which corresponds to one dopant in a supercell. All the computations and discussions are based on this doping concentration unless mentioned otherwise. The Brillouin zone was sampled with a  $5 \times 5 \times 1$  k points setting for geometry optimizations, and a  $15 \times 15 \times 1$  grid was used for electronic structure computations. The charge transfer was evaluated by the Hirshfeld population analysis method.<sup>6</sup>

HER Computations: to theoretically evaluate the performance of an HER catalyst, we computed the Gibbs free energy change ( $\Delta G_{H^*}$ ) for a hydrogen atom absorbed onto the catalyst's surface. The  $\Delta G_{H^*}$  was calculated as:

$$\Delta G_{H^*} = \Delta E_{H^*} + \Delta E_{ZPE} - T\Delta S_{H^*} \quad (1)$$

where  $\Delta E_{H^*}$  is the hydrogen absorption energy,  $\Delta E_{ZPE}$  and  $\Delta S_{H^*}$  are the difference of zero-point energy and the difference of entropy between the adsorbed hydrogen and hydrogen in the gas phase, respectively, and  $T$  is set to 298.15 K. After some approximations and corrections,<sup>7</sup> formula (1) could be simplified as formula (2):

---


$$\Delta G_{H^*} = \Delta E_{H^*} + 0.24 \text{ eV} \quad (2)$$

The absorption energy for hydrogen ( $\Delta E_{H^*}$ ) bonding to the doped  $C_3N_4$  was defined as:

$$\Delta E_{H^*} = E_{H-Cat} - E_{Cat} - 1/2 E_{H_2} \quad (3)$$

where  $E_{H-Cat}$  is the total energy of the doped  $C_3N_4$  sheet with absorbed hydrogen atom,  $E_{Cat}$  is the total energy of the doped  $C_3N_4$  sheet, and  $E_{H_2}$  is the energy of a hydrogen molecule in the gas phase.

ORR Computations: our experiments were operated under alkaline condition ( $pH = 13$ ), the associate  $4e^-$  overwhelming ORR process,  $O_2 + 2H_2O(l) + 4e^- \rightarrow 4OH^-$ , has been proved by detecting the  $HO_2^-$  yield. Thus, the mechanism can be written as:

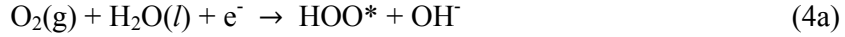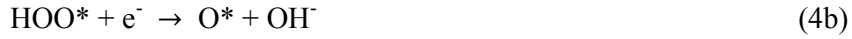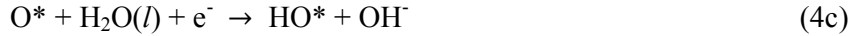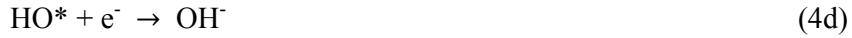

where the \* represents the active site.

Hereby, we computed the free energy change of each reaction step based on the standard hydrogen electrode (SHE) model.<sup>8</sup> The free energy change for each step is defined as  $\Delta G$ :

$$\Delta G = \Delta E + \Delta E_{ZPE} - T\Delta S + \Delta G_{pH} + \Delta G_U \quad (5)$$

where  $\Delta E$  is the reaction energy obtained from the DFT calculations directly,  $E_{ZPE}$  is the zero-point energy, and  $\Delta S$  is the difference in entropy, which is neglected for those intermediates here.  $\Delta G_{pH}$  is a correction related to pH, computed by  $\Delta G_{pH} = k_B T \times \ln 10 \times pH$ , where  $k_B$  is the Boltzmann constant.  $\Delta G_U = neU$ , where  $n$  is the number of electrons transferred during the reaction step and  $U$  is the electrode potential. We set the standard hydrogen electrode (SHE) as the reference, where  $H^+(aq) + e^- = 1/2 H_2(g)$ , and its free energy change is 0. Some thermodynamic data, e.g. entropies and zero point energies referred to the handbook.<sup>9</sup> These data are used to construct the Gibbs free energy of  $H_2$  gas molecule

---

and H<sub>2</sub>O gas molecule at a pressure of 0.035 bar. Then the Gibbs free energy of H<sub>2</sub>O(*l*) is obtained using the free energy of H<sub>2</sub>O(*g*) at 0.035 bar, in which pressure they are in equilibrium to each other. Considering that the equilibrium potential for the half reaction O<sub>2</sub>(*g*) + 4H<sup>+</sup> + 4e<sup>-</sup> = 2H<sub>2</sub>O(*l*) under the standard condition is 1.23 V, the free energy of O<sub>2</sub>(*g*) was derived as  $G_{\text{O}_2(\text{g})} = 2G_{\text{H}_2\text{O}(\text{l})} - 2G_{\text{H}_2(\text{g})} + 4.92 \text{ eV}$ . The free energies of other products and intermediates were computed by DFT method. The equilibrium reduction potential U<sup>0</sup> for O<sub>2</sub> to OH<sup>-</sup> at pH = 13 is 0.46 V versus SHE following the 4e<sup>-</sup> pathway.<sup>10</sup>

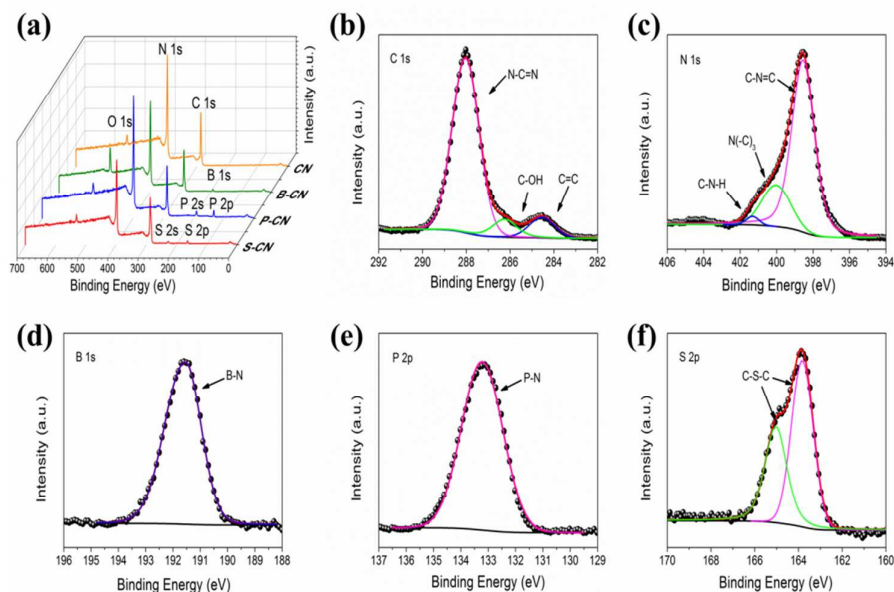

**Figure S1.** XPS analyses of different samples: (a) survey spectra of different X-CN and bare g-C<sub>3</sub>N<sub>4</sub> samples; (b) C 1s and (c) N 1s high resolution spectra recorded from the bare g-C<sub>3</sub>N<sub>4</sub> sample; (d) B 1s, (e) P 2p, (f) S 2p core spectra from the B-CN, P-CN and S-CN samples, respectively.

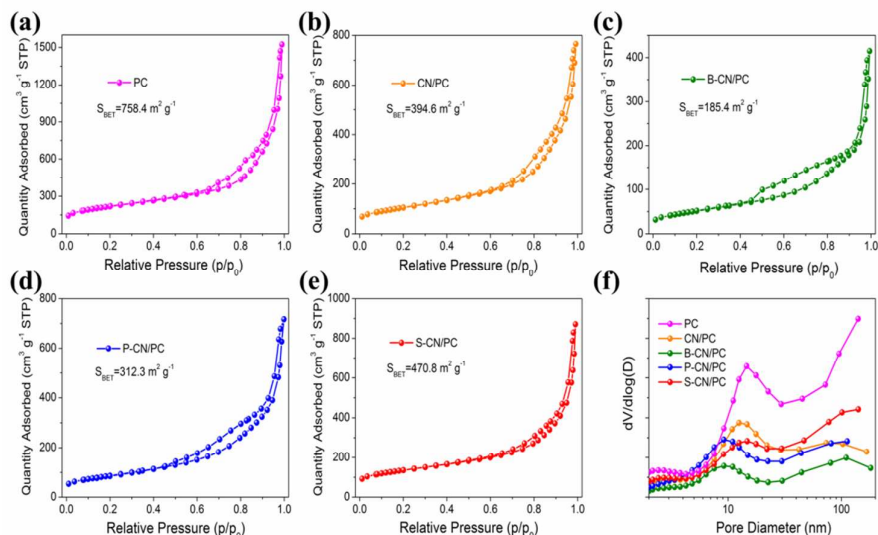

**Figure S2.** N<sub>2</sub> adsorption/desorption isotherms of (a) bare porous carbon substrate, (b) CN/PC, (c) B-CN/PC, (d) P-CN/PC, (e) S-CN/samples; their corresponding specific surface areas are also given. (f) Pore diameter distribution of all samples.

Note: The carbon substrate has a hierarchical porous structure. The micro- and meso-architecture is reasonably from the leaching of small molecules during the pyrolysis process, while the macro-pore is evidently introduced by the silica template. Considering the deliberately introduced macro-pores, the carbon substrate is named as macroporous carbon (PC) in the text. Also note that the dopant-induced texture difference could affect the nano-architecture of the X-CN/PC samples, from which the B/P doped composites have smaller parameters (specific surface area, pore diameter) compared with the other two, according with the TEM morphology observations in Figure 1e-l. The decreased surface area and the gradually dwindling pore diameter also indicate the filling effect of the *in situ* polymerized g-C<sub>3</sub>N<sub>4</sub> species in the pores of the PC substrate.

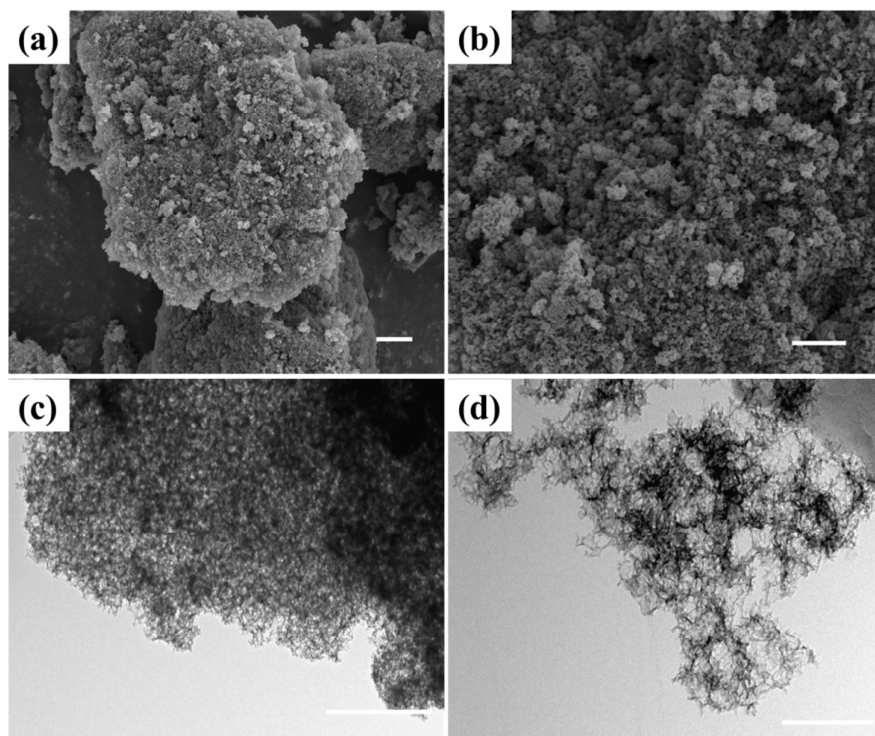

**Figure S3.** Low (a) and high (b) magnification SEM image of the CN/PC sample; low (c) and high (d) magnification TEM image showing the porous structure of the CN/PC hybrid catalyst. Scale bar: (a) 2  $\mu\text{m}$ , (b) 1  $\mu\text{m}$ , (c) 1  $\mu\text{m}$ , (d) 200 nm.

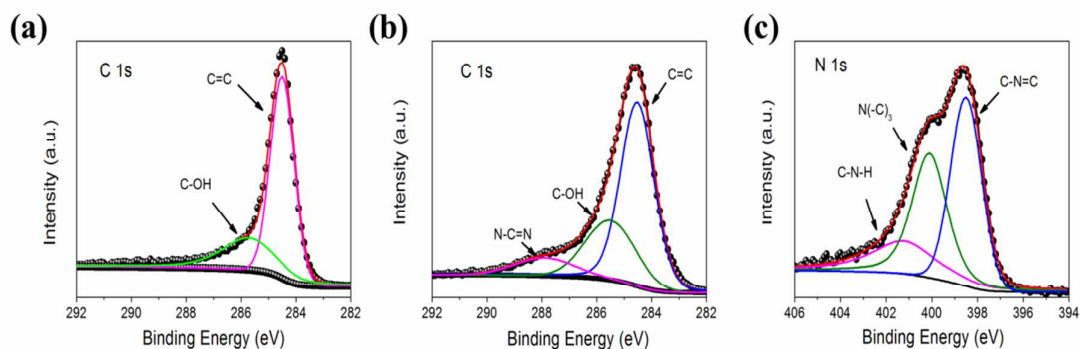

**Figure S4.** High resolution C 1s XPS spectra recorded from (a) bare PC substrate and (b) the CN/PC catalyst; (c) N 1s XPS spectrum from the CN/PC sample.

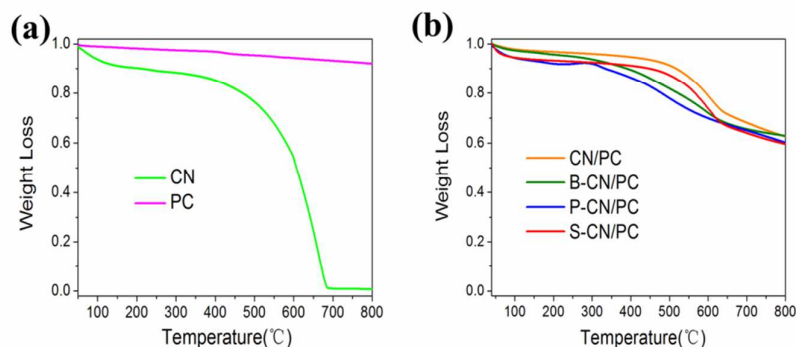

**Figure S5.** Thermal gravimetric analyses of the weight change of (a) bare CN and PC, (b) X-CN/PC series samples with a ramp rate of 5 °C /min under Ar flow (100 mL/min).

Note: the pure g-C<sub>3</sub>N<sub>4</sub> (CN in the figure) starts to sublimation and decompose when temperature is above *ca.* 500 °C, which then loses 100 % weight at 690 °C. The PC carbon, by contrast, is quite stable until 800 °C. The weight percentage of the pristine, B-, P- and S-doped g-C<sub>3</sub>N<sub>4</sub> within the hybrids are determined to be 25 wt%, 28 wt%, 22 wt% and 24 wt% respectively. The comparative loading mass of the different g-C<sub>3</sub>N<sub>4</sub> species allows a viable comparison study of their electrocatalytic activity.

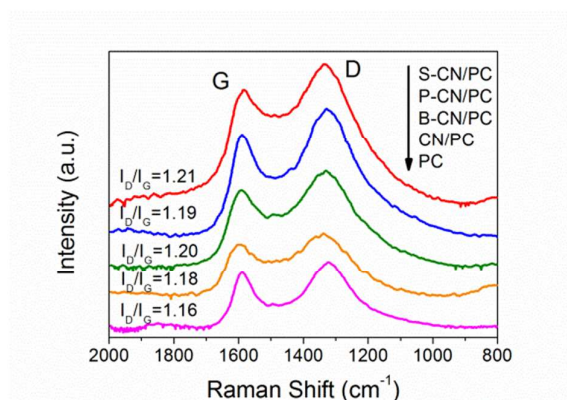

**Figure S6.** Raman spectra of the X-CN/PC series samples with the bare PC sample as reference. The relatively  $I_D/I_G$  ratios are also listed.



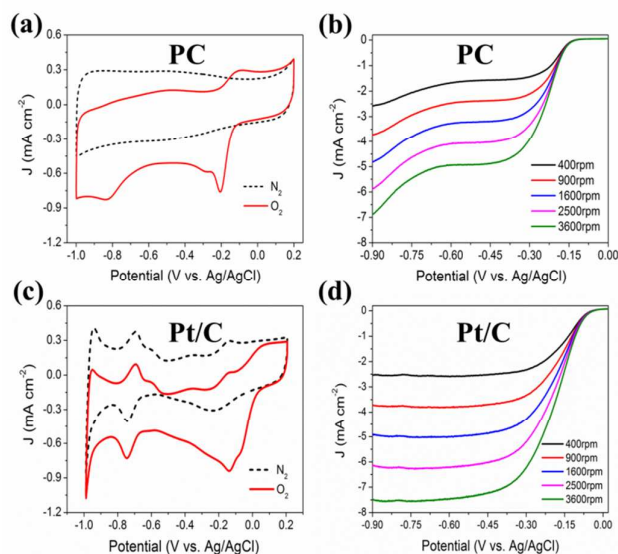

**Figure S7.** Electrochemical catalytic performance toward ORR in 0.1 M KOH solution of the control samples: CV scans of the bare PC substrate (a) and commercial 20 wt% Pt/C (c) sample; LSV curves of the PC (b) and Pt/C (d) samples at different rotating speeds.

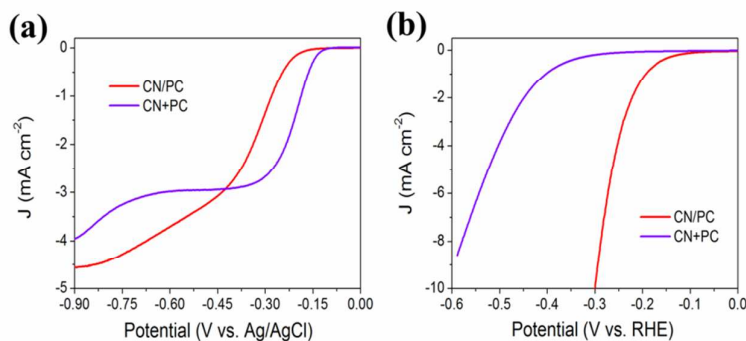

**Figure S8.** (a) ORR and (b) HER activity comparison of the *in situ* polymerized CN/PC hybrid catalyst and the CN and PC mechanical mixture sample upon the same loading mass. The CN weight percentage was set as 25 wt%, in accordance with that in the CN/PC hybrid sample.

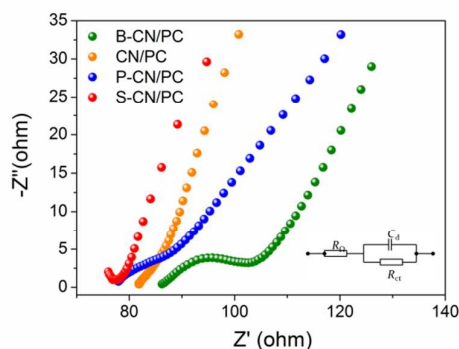

**Figure S9.** Electrochemical impedance spectroscopy data for the ORR process of different samples; data were collected for the electrodes at -0.3 V (vs. Ag/AgCl) in O<sub>2</sub> saturated 0.1 M KOH, frequency range: 1 Hz to 10<sup>5</sup> Hz; inset is the equivalent circuit.

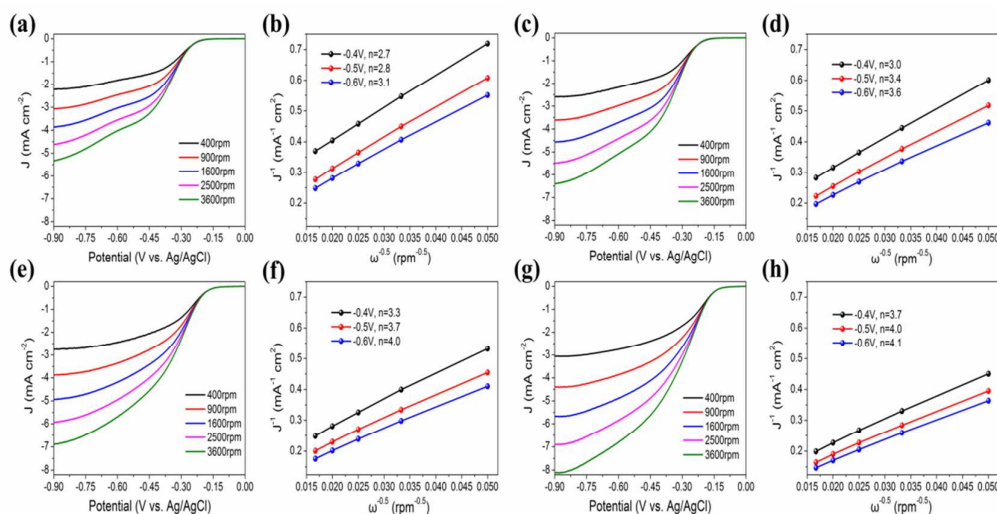

**Figure S10.** LSV curves at different rotation speeds from 400 to 3600 rpm of (a) B-CN/PC, (c) CN/PC, (e) P-CN/PC, (g) S-CN/PC samples and the Koutecky–Levich plots of (b) B-CN/PC, (d) CN/PC, (f) P-CN/PC and (h) S-CN/PC at different potentials. The corresponding electron transfer numbers ( $n$ ) are also given.

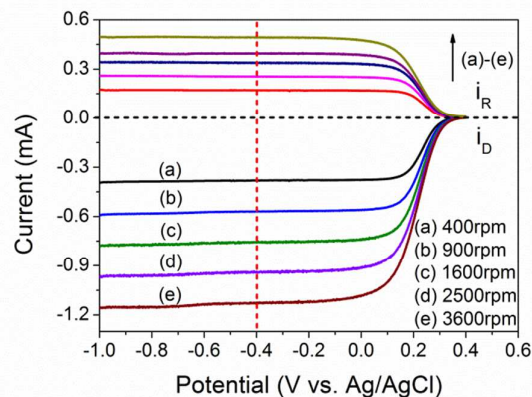

**Figure S11.** RRDE (Pt ring GC disk electrode) voltammograms for the reduction of  $K_3[Fe(CN)_6]$  at the disk electrode in  $N_2$  saturated aqueous KCl solution with disc scan rate of  $10 \text{ mV s}^{-1}$  at different rotation speeds.

Note: The current collection efficiency ( $N$ ) of Pt ring in RRDE technique is determined by using single electron reversible couple of ferrocyanide/ferricyanide system.<sup>11</sup> Specifically, a mirror-polished Pt ring GC disk electrode was immersed into  $N_2$  saturated 0.5 M KCl solution containing 10 mM  $K_3[Fe(CN)_6]$ . The disk electrode was scanned between -1.0 – 0.4 V (vs. Ag/AgCl) at  $10 \text{ mV s}^{-1}$  and the ring potential was set at 0.5 V. The LSV curves were recorded at rotation speeds of 400-3600 rpm and the ratio the ring and disk limiting currents ( $N = i_r/i_d$ ) reveals the  $N$ . In the present system, the  $N$  was determined to be 0.44 irrespective of the rotation speed.

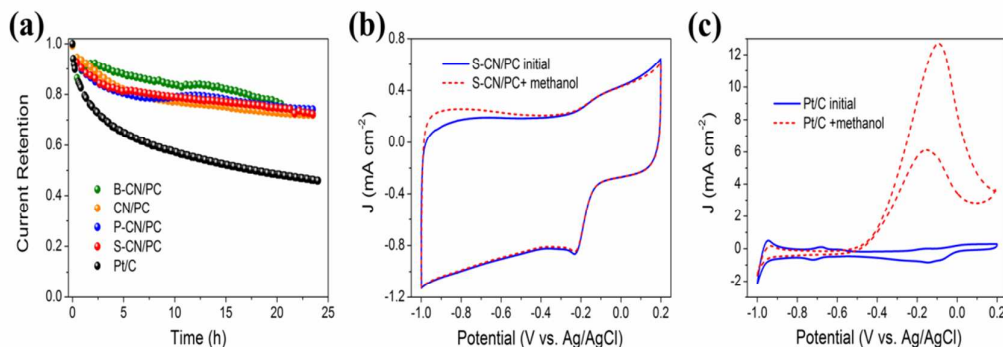

**Figure S12.** (a) Chronoamperometric durability tests of the X-CN samples and referenced Pt/C sample at 1600 rpm and -0.3 V (vs Ag/AgCl) in O<sub>2</sub> saturated 0.1 M KOH; cross-over tolerance tests of the representative S-CN/PC (b) and Pt/C (c) samples before and after the addition of 10 vol% methanol into the electrolyte. The drastic anodic current of the Pt/C modified electrode suggests the susceptible selectivity of Pt/C catalyst.

Note: In a continuous amperometric i-t test at 1600 rpm and -0.3 V potential, the Pt/C sample loses approximately 54% of its initial current density, whilst all the g-C<sub>3</sub>N<sub>4</sub>-based samples profile similar but much better stability with reduction current preservation of around 75% (Figure S12a). The improved durability is presumably owing to the high chemical stability of the carbon nitride species and the robustness of the interconnected PC substrate. Moreover, a much enhanced reaction selectivity of the representative S-CN/PC with regard to the referenced Pt/C catalyst is observed in the methanol mixed electrolyte, suggesting the good cross-over tolerance of the metal-free catalyst (Figure S12b, c).

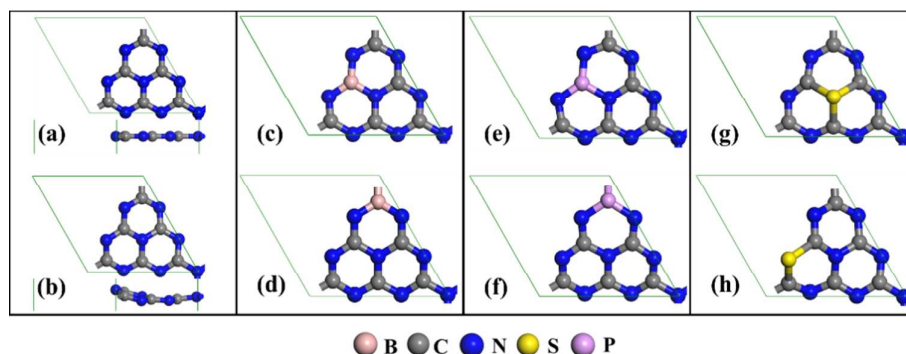

**Figure S13.** The top views and side views of (a) coplanar and (b) corrugated structures of g-C<sub>3</sub>N<sub>4</sub> unit cell. The optimized structures of g-C<sub>3</sub>N<sub>4</sub> doping by B (c and d), P (e and f), and S (g and h) atoms, with the dopants replacing the carbon atoms at different positions.

Note: Both the coplanar and corrugated structures of unit cell g-C<sub>3</sub>N<sub>4</sub> are shown, whereas the corrugated structure is energetically more stable, thus is adopted as pristine C<sub>3</sub>N<sub>4</sub> for the following calculations. In terms of energy per unit cell, the energy of corrugated structure is 0.2 eV lower than that of coplanar structure.

Based on our experimental findings and other groups' works,<sup>12-15</sup> we constructed six structures by doping g-C<sub>3</sub>N<sub>4</sub> with boron, phosphorous, and sulfur atoms. In Figure S13, (c) and (e) are corner-carbon replaced doping; (d) and (f) are bay-carbon replaced doping; (g) is graphitic nitrogen replaced doping and (h) is pyridinic nitrogen replaced doping. Interestingly, all the six doped structures have extra one unpaired electron caused by the doping, giving a doublet spin multiplicity. As to the stability, we found that it is more favorable if boron or phosphorus atom replaces the bay-carbon, and sulfur atom replaces the pyridinic nitrogen. Thus, we would select (d), (f), (h) as B-doped, P-doped, and S-doped C<sub>3</sub>N<sub>4</sub> for following calculations. Note that all the structures favor corrugated configurations to avoid the electron lone pair interactions between the N atoms.

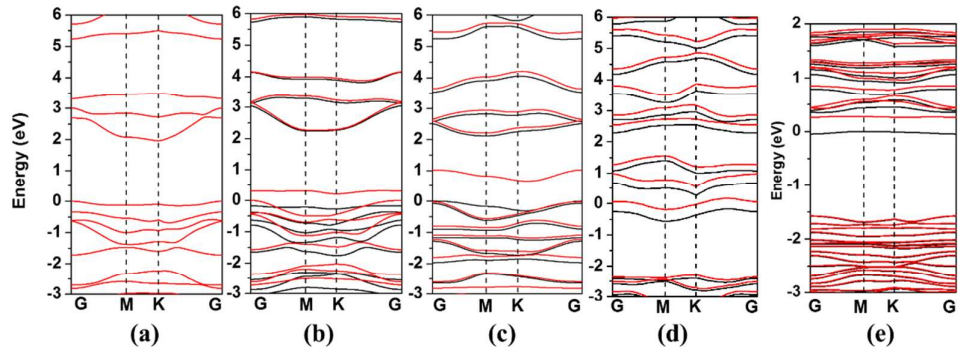

**Figure S14.** Band structures of (a) pristine, (b) B-doped, (c) P-doped, (d) S-doped and (e) S-doped  $C_3N_4$  with lower doping concentration. The Fermi level was set at 0.

Note: The red bands and black bands here represent the spin up and spin down electrons separately. All the computations are first based on an identical dopant concentration of 7.14 at%, which corresponds to one dopant in a supercell. As shown above, the band gaps of pristine, B-, P-, and S-doped  $C_3N_4$  are 1.95, 0.21, 0.66 and 0.10 eV, respectively. For clarifying the potential impact of heteroatom concentration distinctions, we also examined the model of S-doped  $C_3N_4$  with different S concentrations. When decreasing the doping concentration from 7.14 at% to a much lower value of 1.78 at%, the band gap of the S-CN sample only shows a small change from 0.10 eV to 0.26 eV, yet both are remarkably smaller than that of the pristine CN sample (1.95 eV).

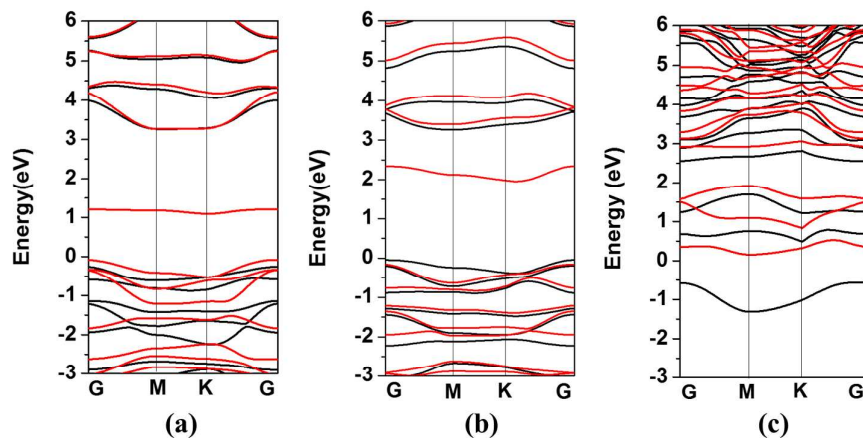

**Figure S15.** Band structures of (a) B-doped, (b) P-doped, (c) S-doped  $C_3N_4$  calculated by HSE06 functional. We set the Fermi level at 0. The red bands and black bands here represent the spin up and spin down electrons separately. The band gaps of B-doped, P-doped and S-doped  $C_3N_4$  are 1.17, 2.00, and 0.74 eV, respectively.

Note: We realized that the band gaps calculated using GGA-PBE functional are generally underestimated.<sup>16</sup> For example, the experimental band gap of condensed graphitic carbon nitride (g- $C_3N_4$ ) is about 2.7 eV, investigated by Wang *et al.*<sup>17</sup> However, our PBE calculation shows a smaller band gap of 1.95 eV. To solve this problem, we further employed HSE functional, which has been proven to well describe the band gaps,<sup>18</sup> to re-evaluate the band gap values.

According to our HSE calculation, the pristine g- $C_3N_4$  has a large band gap about 3.16 eV, which is much larger than our PBE result and very close to the experiment value. Thus, HSE functional was also applied to calculate the band gaps of B-doped, P-doped and S-doped  $C_3N_4$  monolayers, as shown in Figure S15. Compared with our PBE results in Figure S14, all the band gaps are enlarged prominently.

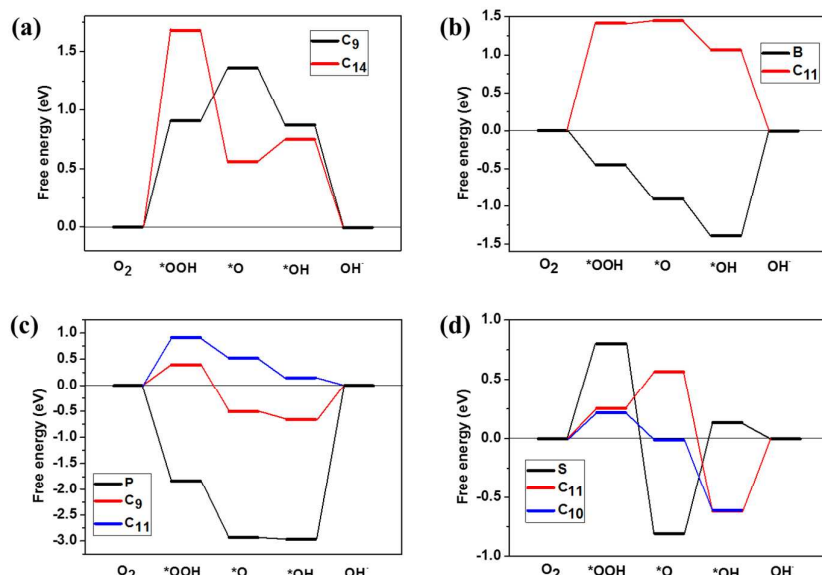

**Figure S16.** Free energy diagrams of each reaction step on (a) pristine, (b) B-doped, (c) P-doped and (d) S-doped  $C_3N_4$ , at the equilibrium potential  $U^0 = 0.46$  V. The lines of different colors represent the reactions on different active sites, and free energy diagram of the best active site for each doped  $C_3N_4$  would show in Figure 5.

Note: For (a) pristine  $C_3N_4$ ,  $C_9$  and  $C_{14}$  are considered, as they are different kinds of carbon atoms. Owing to the highest energy barrier of the first step on  $C_{14}$  (a, red line),  $C_9$  is thought to be the real active site of pristine  $C_3N_4$ . The most sluggish step on  $C_9$  is also the first step, with an energy value of 0.91 eV.

As to B-doped  $C_3N_4$  (b), it seems that B atom has large attractions to O-containing species accounting for the negative value of the reaction free energies shown by black line. B atom is proved to be the real active site of B-doped  $C_3N_4$ , with an energy barrier of 1.39 eV at the last step, while reaction on  $C_{11}$  has a larger energy barrier of 1.41 eV at the first step (b, red line). Hereby, we omitted the reaction pathway of  $C_9$  because of the very bad results.

Different from B-doped  $C_3N_4$ , the real active sites of P-doped, and S-doped  $C_3N_4$  are not the dopants. It is  $C_9$  of P-doped  $C_3N_4$  that shows a relatively small energy barrier of 0.66 eV at the last step (c, red line). For other calculated potential active sites, the energy barriers are larger, especially for P atom owing to its strong attraction to O-containing species.



---

Impressively, two real active sites of S-doped ( $C_{10}$  and  $C_{11}$ ) are confirmed by our calculations, as shown in (d) by blue and red lines. Red line has three uphill, except for its third step, while blue line has two uphill at its first and fourth steps. However, the most sluggish step of these two lines is the same one, *i.e.*, the last step forming hydroxide anion. Additionally, the largest energy barrier is 0.61 eV, much lower than the energy barrier saw on black line (S atom as potential active site).

Thus, only the active sites with best performances are shown in Figure 5, while only one real active site of S-doped  $C_3N_4$  is illustrated in Figure 5 to simplify.

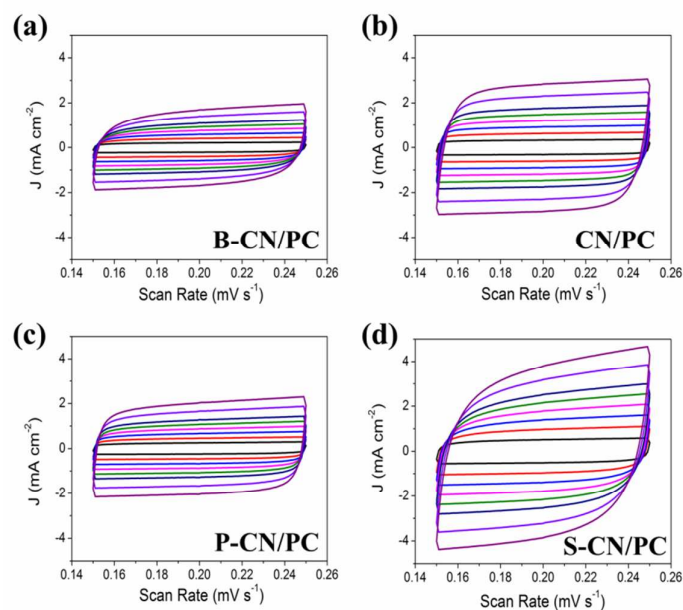

**Figure S17.** CV curves of different samples recorded in an overpotential window between 0.15 and 0.25 V (vs. RHE) at scan rates from 20 to 200  $\text{mV s}^{-1}$ .

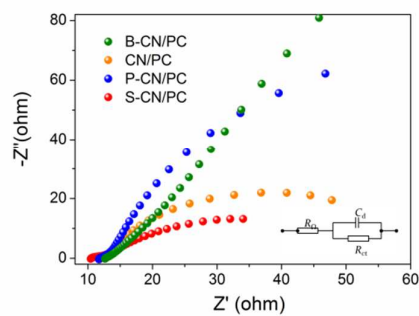

**Figure S18.** Electrochemical impedance spectroscopy data for HER process of different catalysts; data were collected for the electrodes under HER overpotential of 200 mV in  $\text{N}_2$  pruged 0.5 M  $\text{H}_2\text{SO}_4$ , frequency range: 1 Hz to  $10^5$  Hz; inset is the equivalent circuit.

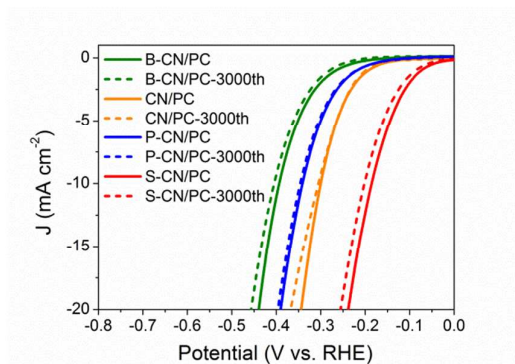

**Figure S19.** Durability tests of different catalysts. All the catalysts show only slight decay after 3000 cycles at  $100 \text{ mV s}^{-1}$  from -0.4 to 0.2 V (vs. RHE).

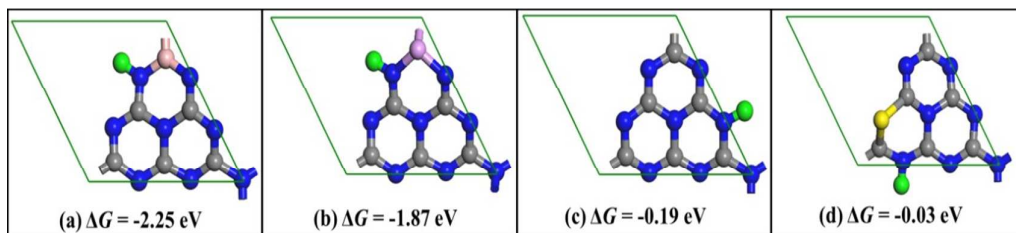

**Figure S20.** The computed Gibbs free energies ( $\Delta G$ ) of the most favorable HER on (a) B-, (b) P-, (c) pristine, and (d) S-doped  $\text{C}_3\text{N}_4$ . The green balls are hydrogen atoms.

**Table S1** Porous structural characteristics of different samples

| Sample             | $S_{\text{BET}}$           | $S_{\text{micro}}$ | $V_{\text{tol}}$            | $V_{\text{micro}}$ |
|--------------------|----------------------------|--------------------|-----------------------------|--------------------|
|                    | $\text{m}^2 \text{g}^{-1}$ |                    | $\text{cm}^3 \text{g}^{-1}$ |                    |
| Bare Porous carbon | 758.4                      | 169.3              | 2.3153                      | 0.0787             |
| CN/PC              | 394.6                      | 35.5               | 1.1691                      | 0.0140             |
| B-CN/PC            | 185.4                      | 6.1                | 0.6339                      | 0.0009             |
| P-CN/PC            | 312.3                      | 10.5               | 0.9635                      | 0.0017             |
| S-CN/PC            | 470.8                      | 92.0               | 1.3210                      | 0.0495             |

**Table S2.** Hirshfeld charges and spin densities of the atoms numbered as 7 to 14 in different structures

|    | pristine C <sub>3</sub> N <sub>4</sub> |       | B-doped C <sub>3</sub> N <sub>4</sub> |       | P-doped C <sub>3</sub> N <sub>4</sub> |      | S-doped C <sub>3</sub> N <sub>4</sub> |       |       |       |       |
|----|----------------------------------------|-------|---------------------------------------|-------|---------------------------------------|------|---------------------------------------|-------|-------|-------|-------|
|    | charge                                 |       | charge                                | spin  | charge                                | spin | charge                                | spin  |       |       |       |
| 7  |                                        |       |                                       |       |                                       |      | S                                     | 0.118 | 0.098 |       |       |
| 9  | C                                      | 0.172 | C                                     | 0.164 | 0.028                                 | C    | 0.165                                 | 0.022 | C     | 0.095 | 0.107 |
| 10 | C                                      | 0.169 | C                                     | 0.164 | 0.024                                 | C    | 0.165                                 | 0.022 | C     | 0.154 | 0.035 |
| 11 | C                                      | 0.170 | C                                     | 0.167 | 0.009                                 | C    | 0.168                                 | 0.005 | C     | 0.134 | 0.131 |
| 12 | C                                      | 0.172 | C                                     | 0.173 | 0.005                                 | C    | 0.155                                 | 0.018 | C     | 0.089 | 0.129 |
| 13 | C                                      | 0.171 | B                                     | 0.180 | 0.017                                 | P    | 0.408                                 | 0.472 | C     | 0.148 | 0.089 |
| 14 | C                                      | 0.174 | C                                     | 0.173 | 0.005                                 | C    | 0.155                                 | 0.018 | C     | 0.142 | 0.100 |

Here is the calculated positive Hirshfeld charges and spin densities of carbon atoms and dopants. Simply, we denoted the largest charge and spin density of carbon atom by red rectangle. These denoted carbon atoms and dopants (red letters) are considered as potential active sites. In the system of pristine  $\text{C}_3\text{N}_4$ ,  $\text{C}_9$  is also included, because  $\text{C}_9$  is quite different from  $\text{C}_{14}$ , considering their chemical environments.

**Table S3.** Comparison study of ORR performance of different metal-free catalysts in 0.1 M KOH

| Catalyst                                     | Onset Potential (V)      | Electron transfer number (n) | HO <sub>2</sub> <sup>-</sup> yield | Reference                                     |
|----------------------------------------------|--------------------------|------------------------------|------------------------------------|-----------------------------------------------|
| C <sub>3</sub> N <sub>4</sub> @CMK-3         | ~ 0.1<br>(vs. Ag/AgCl)   | ~4.0                         | -                                  | J. Am. Chem. Soc. <b>2011</b> , 133, 20116    |
| Macroporous C <sub>3</sub> N <sub>4</sub> @C | -0.14<br>(vs. Ag/AgCl)   | ~3.0                         | < 50%                              | Angew. Chem. Int. Ed. <b>2012</b> , 51, 3892  |
| N-doped Graphene Framework                   | -0.18<br>(vs. Ag/AgCl)   | 3.7                          | < 20%                              | Angew. Chem. Int. Ed. <b>2012</b> , 51, 11371 |
| S,N co-doped Mesoporous Graphene             | -0.06<br>(vs. Ag/AgCl)   | 3.3-3.6                      | < 35%                              | Angew. Chem. Int. Ed. <b>2012</b> , 51, 11496 |
| P-doped Graphene                             | 0.92<br>(vs. RHE)        | 3.0-3.8                      | < 50%                              | Adv. Mater. <b>2013</b> , 25, 4932.           |
| s-g-C <sub>3</sub> N <sub>4</sub> @GQD       | -0.07<br>(vs. Ag/AgCl)   | ~3.5                         | < 30%                              | J. Mater. Chem. A, <b>2015</b> , 3, 1841      |
| 3D N-doped Graphene Nanoribbons              | -0.05<br>(vs. Ag/AgCl)   | 3.71-3.96                    | < 14.7%                            | Small <b>2015</b> , 11, 1423                  |
| N-doped Porous Carbon Superstructures        | -                        | ~3.20-3.94                   | < 20%                              | Adv. Mater. <b>2016</b> , 28, 1981            |
| N,P-codoped CNT/graphene hybrid              | 0.94<br>(vs. RHE)        | ~3.88-4.0                    | < 6%                               | Adv. Mater. <b>2016</b> , 28, 4606            |
| CN/PC                                        | -0.14V<br>(vs. Ag/AgCl)  | 3.25-3.64                    | < 38%                              | This work                                     |
| B-CN/PC                                      | -0.17 V<br>(vs. Ag/AgCl) | 3.11-3.40                    | < 45%                              | This work                                     |
| P-CN/PC                                      | -0.1 V<br>(vs. Ag/AgCl)  | 3.55-3.78                    | < 23%                              | This work                                     |
| S-CN/PC                                      | -0.07 V<br>(vs. Ag/AgCl) | 3.74-3.89                    | < 13%                              | This work                                     |

**Table S4.** Comparison study of HER performance of different catalysts in 0.5 M H<sub>2</sub>SO<sub>4</sub>

| Catalyst                                     | Loading Mass ( $\mu\text{g cm}^{-2}$ ) | Onset Potential (mV vs. RHE) | $\eta$ @ 10 mA $\text{cm}^{-2}$ (mV vs. RHE) | Tafel Slope ( $\text{mV dec}^{-1}$ ) | $J_0$ , geometric ( $\mu\text{A cm}^{-2}$ ) | Reference                                       |
|----------------------------------------------|----------------------------------------|------------------------------|----------------------------------------------|--------------------------------------|---------------------------------------------|-------------------------------------------------|
| MoO <sub>3</sub> -MoS <sub>2</sub> Nanowires | 60                                     | -(150-200)                   | ~ -250                                       | 50-60                                | 0.082                                       | Nano Lett. <b>2011</b> , 11, 4168.              |
| MoS <sub>2</sub> Nanosheets                  | 285                                    | -120                         | ~ -180                                       | 50                                   | 8.9                                         | Adv. Mater. <b>2013</b> , 25, 5807.             |
| Co-NRCNTs                                    | 280                                    | -50                          | -260                                         | 80                                   | 10                                          | Angew. Chem. Int. Ed. <b>2014</b> , 53, 4372    |
| N/Co-doped PCP//NRGO                         | 357                                    | -58                          | -229                                         | 126                                  | -                                           | Adv. Funct. Mater. <b>2015</b> , 25, 872.       |
| Porous Co-N-C                                | 2000                                   | -20                          | -133                                         | 57                                   | 70                                          | Nature Comm. <b>2015</b> , 6, 7992              |
| Textured MoS <sub>2</sub> Microflakes        | -                                      | ~-100                        | -174                                         | 63                                   | 19                                          | Nano Lett. <b>2016</b> , 16, 4047.              |
| N,P-doped Graphene                           | 200                                    | -290                         | -420                                         | 91                                   | 0.24                                        | ACS Nano, <b>2014</b> , 8, 5290.                |
| C <sub>3</sub> N <sub>4</sub> @NG            | ~100                                   | -                            | -240                                         | 51                                   | 0.35                                        | Nature Comm. <b>2014</b> , 5, 3783.             |
| g-C <sub>3</sub> N <sub>4</sub> Nanoribbon-G | 143                                    | -80                          | -207                                         | 54                                   | 39.8                                        | Angew. Chem. Int. Ed. <b>2014</b> , 126, 14154. |
| g-C <sub>3</sub> N <sub>4</sub> @S-Se-pGr    | 280                                    | -92                          | -300                                         | 86                                   | 6.27                                        | J. Mater. Chem. A, <b>2015</b> , 3, 12810.      |
| N,S-doped Graphene 500C                      | -                                      | -130                         | -276                                         | 81                                   | 8.4                                         | Angew. Chem. Int. Ed. <b>2015</b> , 54, 2131.   |
| CN/PC                                        | 280                                    | -167                         | -300                                         | 100                                  | 11.3                                        | This work                                       |
| B-CN/PC                                      | 280                                    | -254                         | -405                                         | 93                                   | 0.8                                         | This work                                       |
| P-CN/PC                                      | 280                                    | -201                         | -343                                         | 100                                  | 4.8                                         | This work                                       |
| S-CN/PC                                      | 280                                    | -55                          | -186                                         | 84                                   | 13.8                                        | This work                                       |

## References SI

1. Delley, B. An All - Electron Numerical Method for Solving the Local Density Functional for Polyatomic Molecules. *J. Chem. Phys.* **1990**, 92, 508-517.
2. Delley, B. From Molecules to Solids with the DMol<sup>3</sup> Approach. *J. Chem. Phys.* **2000**, 113, 7756-7764.
3. Grimme, S. Semiempirical GGA - Type Density Functional Constructed with A Long - Range Dispersion Correction. *J. Comput. Chem.* **2006**, 27, 1787-1799.
4. Perdew, J. P.; Burke, K.; Ernzerhof, M. Generalized Gradient Approximation Made Simple. *Phys. Rev. Lett.* **1996**, 77, 3865.
5. Klamt, A.; Schüürmann, G. COSMO: A New Approach to Dielectric Screening in Solvents with Explicit Expressions for the Screening Energy and its Gradient. *J. Chem. Soc., Perkin Transactions 2* **1993**, 799-805.

- 
6. Hirshfeld, F. L. Bonded-Atom Fragments for Describing Molecular Charge Densities. Theoretical Chemistry Accounts: Theory, Computation, and Modeling, *Theoretica Chimica Acta*, **1977**, 44, 129-138.
  7. Nørskov, J. K.; Bligaard, T.; Logadottir, A.; Kitchin, J.; Chen, J.; Pandelov, S.; Stimming, U. Trends in the Exchange Current for Hydrogen Evolution. *J. Electrochem. Soc.* **2005**, 152, J23-J26.
  8. Nørskov, J. K.; Rossmeisl, J.; Logadottir, A.; Lindqvist, L.; Kitchin, J. R.; Bligaard, T.; Jonsson, H. Origin of the Overpotential for Oxygen Reduction at A Fuel-Cell Cathode. *J. Phys. Chem. B* **2004**, 108, 17886-17892.
  9. Weast, R. C. *Handbook of chemistry and physics, 49th Edition*. Cleveland, OH: Chemical Rubber Company, **1969**.
  10. Ge, X.; Sumboja, A.; Wu, D.; An, T.; Li, B.; Goh, F. T.; Hor, T. A.; Zong, Y.; Liu, Z. Oxygen Reduction in Alkaline Media: from Mechanisms to Recent Advances of Catalysts. *ACS Catal.* **2015**, 5, 4643-4667.
  11. Hancock, C. A.; Ong, A. L.; Slater, P. R.; Varcoe, J. R. Development of  $\text{CaMn}_{1-x}\text{Ru}_x\text{O}_{3-y}$  ( $x=0$  and 0.15) Oxygen Reduction Catalysts for Use in Low Temperature Electrochemical Devices Containing Alkaline Electrolytes: *Ex Situ* Testing Using the Rotating Ring-Disk Electrode Voltammetry Method. *J. Mater. Chem. A* **2014**, 2, 3047-3056.
  12. Zhang, Y.; Mori, T.; Ye, J.; Antonietti, M. Phosphorus-Doped Carbon Nitride Solid: Enhanced Electrical Conductivity and Photocurrent Generation. *J. Am. Chem. Soc.* **2010**, 132, 6294-6295.
  13. Gang, C.; Shang-Peng, G. Structure and Electronic Structure of S-Doped Graphitic  $\text{C}_3\text{N}_4$  Investigated by Density Functional Theory. *Chin. Phys. B* **2012**, 21, 107101.
  14. Wang, Y.; Li, H.; Yao, J.; Wang, X.; Antonietti, M. Synthesis of Boron Doped Polymeric Carbon Nitride Solids and Their Use as Metal-Free Catalysts for Aliphatic C–H Bond Oxidation. *Chem. Sci.* **2011**, 2, 446-450.
  15. Liu, G.; Niu, P.; Sun, C.; Smith, S. C.; Chen, Z.; Lu, G. Q.; Cheng, H.-M. Unique Electronic Structure Induced High Photoreactivity of Sulfur-Doped Graphitic  $\text{C}_3\text{N}_4$ . *J. Am. Chem. Soc.* **2010**, 132, 11642-11648.
  16. Filippi, C.; Singh, D. J.; Umrigar, C. J., All-Electron Local-Density and Generalized-Gradient Calculations of the Structural Properties of Semiconductors. *Phys. Rev. B* **1994**, 50, 14947.
  17. Wang, X.; Maeda, K.; Thomas, A.; Takanabe, K.; Xin, G.; Carlsson, J. M.; Domen, K.; Antonietti, M., A Metal-Free Polymeric Photocatalyst for Hydrogen Production from Water under Visible Light. *Nat. Mater.* **2009**, 8, 76-80.
  18. Heyd, J.; Scuseria, G. E.; Ernzerhof, M., Hybrid Functionals Based on A Screened Coulomb Potential. *J. Chem. Phys.* **2003**, 118, 8207-8215.
